# Supplementary material for: Taller de formación para padres y madres: agentes promotores de salud sexual
Source: PLOS journal article supplement (doi:10.1371/journal.pcbi.0030029), 2000-01-01
Supplement: S4 (10.1371/journal.pcbi.0030029.s004) [file journal.pcbi.0030029.s004]

**Table S4.** **Mean synonymous and nonsynonymous substitution rates for different HIV variants**

| Data set | | Internal rate (subst./site/month) | | Backbone rate (subst./site/month) | |
| --- | --- | --- | --- | --- | --- |
| synonymous | nonsynonymous | synonymous | nonsynonymous |
| HIV-1 group M | P6 | 7.28E-04  1.49E-04 | 7.93E-04  1.56E-04 | 7.97E-04  2.25E-04 | 7.92E-04  2.21E-04 |
| P5 | 1.03E-03  1.57E-04 | 9.95E-04  1.55E-04 | 7.27E-04  1.82E-04 | 1.73E-03  3.24E-04 |
| P8 | 3.95E-04  7.03E-05 | 1.05E-03  1.41E-04 | 3.37E-04  1.06E-04 | 1.12E-03  1.97E-04 |
| P1 | 3.79E-04  7.75E-05 | 5.27E-04  1.09E-04 | 3.51E-04  1.23E-04 | 7.35E-04  1.97E-04 |
| P7 | 2.84E-04  5.21E-05 | 9.73E-04  1.35E-04 | 3.19E-04  9.02E-05 | 1.35E-03  2.18E-04 |
| P3 | 5.53E-04  1.09E-04 | 1.43E-04  2.61E-04 | 2.98E-04  1.17E-04 | 1.83E-03  3.84E-04 |
| P2 | 4.12E-04  5.95E-05 | 1.21E-03  1.19E-04 | 4.43E-04  1.33E-04 | 1.26E-03  3.46E-04 |
| P9 | 1.44E-04  2.55E-05 | 5.33E-04  7.48E-05 | 1.75E-04  4.31E-05 | 8.06E-04  1.39E-04 |
| P11 | 3.26E-04  8.51E-05 | 9.41E-04  1.76E-04 | 2.86E-04  1.48E-04 | 5.91E-04  2.02E-04 |
| HIV-1 group O | Janssens | 5.17E-04  7.82E-05 | 2.34E-03  2.85E-04 | 4.80E-04  9.75E-05 | 2.76E-03  3.82E-04 |
| Chaix-Baudier | 7.75E-04  2.64E-04 | 4.04E-03  1.05E-03 | 5.76E-04  3.05E-04 | 3.50E-03  1.11E-03 |
| HIV-2 | Pc | 4.08E-04  1.69E-04 | 8.63E-04  3.29E-04 | 4.47E-04  2.86E-04 | 3.79E-04  2.87E-04 |
| Pd | 1.91E-04  1.16E-04 | 7.23E-04  3.91E-04 | 9.63E-05  1.47E-04 | 5.08E-04  3.90E-04 |
| P3P4 | 2.78E-04  1.15E-04 | 1.89E-03  7.15E-04 | 2.61E-04  2.44E-04 | 1.44E-03  1.14E-03 |
| P7P8 | 2.50E-04  6.56E-05 | 3.76E-04  7.74E-05 | 3.24E-04  1.36E-04 | 4.26E-04  1.65E-04 |
| P9P10 | 2.30E-04  6.49E-05 | 2.88E-04  5.27E-05 | 3.48E-04  1.24E-04 | 2.76E-04  7.03E-05 |
| Shi | 8.83E-05  4.57E-05 | 1.71E-04  7.11E-05 | 8.64E-05  4.77E-05 | 2.01E-04  8.32E-05 |
